# Supplementary material
Source: PubMed Central journal article supplement (PMC2901673)
Supplement: supp_9_7_1100__1.pdf [file supp_9_7_1100__1.pdf]

```

StuAP      MASMNQPQPYMDVHS-HLSSGQTYASHPATAGALTHYQYPQPPVLPQ-TSTYGPASS-Y 57
SnStuA    ---MNQMQSYADVHPHMSAATAHAPASAAPSGISHYAYPPQSSMMQPGHQYGPPTPGY 57
FoStuA    ---MNQGHQPDMYY-----SPHYSTPQYG-----YGYSTNGA 30
          *** :. *:: . ** * ** :.

StuAP      SQYPYPNSSVASSQVSPPPPTTSSISSQVPAQLLPLPVTNHPVPTHGYGNSSGTPMQGYVYDP 117
SnStuA    PSYGYSNGVPSG---LPASSSMNNAMVPSTLQLPAMSSSGPSPSLSG--AQSYAPHSFDH 112
FoStuA    PTTAVSTPMPAPQNVLPVPSALSNOGAMQQPGYSNSSNNG-----AFDT 74
          . . . :. * : : . . . . . : *

StuAP      TGQMAPPQAKPRVTATLWEDEGSLCYQVEAKGVCVARREDNGMINGTKLLNVAGMTRGRR 177
SnStuA    TGQVAPPQMKPRVTATLWEDEGSLCFQVEAKGVCVARREDNHMINGTKLLNVAGMTRGRR 172
FoStuA    TGQHNPPQMKPRVTATLWEDEGSLCFQVEARGICVARREDNHMINGTKLLNVAGMTRGRR 134
          *** ** *****:***:***** *****
          APSES domain

StuAP      DGILKSEKRVNVKIGPMLKGVWIPFDRALEFANKEITDILLYPLFVQHISNLLYHPAN 237
SnStuA    DGILKSEKTRHVVKIGPMLKGVWIPFERALEFANKEITEQLYPLFVHDIGALLYHPSN 232
FoStuA    DGILKSEKRVHVVKIGPMLKGVWIPYDRALDFANKEITELLFPLFVHNIGALLYHPSN 194
          ***** :*****:*****: *****: * :*****: . * *****:

StuAP      QNQR----NMTVPDSRRLE--GPQPVVTRPQAQQPPSLHHH--SLQTPVPSHMSQP---- 285
SnStuA    QTRASVGSAAAMAADRRRPPDSMQTRYISGPTTSQPPSLHHHSSMSNPIGAPMSQAPHAL 292
FoStuA    SNRTS---QVMAAAERRKHEGLGQRPAAP---NALPSIGQHHPMPGLPTGGYVP---- 244
          .. : * : : * . ** : * : : .

StuAP      -----GGRPSLDRAHTFPTPPASASSVP-----NTQPLSIDTSL 320
SnStuA    QPHPSAGRPLDRAHTFPTPPTSASSIMGMSNGSSYEWSGANVQTPQGSQPLSIDTGLS 352
FoStuA    -----QSLANGPQSLASTP----- 258
          : : . . * * : *

StuAP      NARSMPTTPATTPPGNNLQGMQSYQPQSGYD-SKPYYSAAPSTHPQYAPQQLPQQSMAQ 379
SnStuA    NTRSVPTTPATTPPG-AVQQAISYGSNQSYDNSRPMYSGPPSQPGQYNTQG---QSMMG 407
FoStuA    ---QPLTNGSQPPMPNGGMLKRGREEEDLHRPVSNGHDPMSNMHAMSNGYQPQPLA 314
          * * : * . : * : * . . : . *

StuAP      YGHSMTSSYRDMAPPSSQRGSVTEIESDVKTER---YGQGTVAKTEP-----EQEQE 429
SnStuA    YRPDS-GYTKTEMAPPS-RLADVSE-EGDVKHSEGMPQGNQVQVAPAPGPEGDEHDNE 464
FoStuA    NVHQPPMQNGGDMKLRGRDEDEVHRSHTAHTD-----MNNMPGSMPLSNAYAQPLP 368
          . . : * . . . . . : . * :

StuAP      YAQPDSGYNTGRGSY-YTNPVSGGLAHDHSQLTPDMTGSPQQNGSGRMTPTRTSNTAP-Q 487
SnStuA    YTHSTASYNGSRGPYGYASNGNAGGLHPEHPHMSPEMNGSPHQNGSGRATPTRTTTSQTQ 524
FoStuA    NVHHQPLANGDGMLKRGREDDDD--VHRSSPNGHDSAGNFVKKRRTITSNDSMVSPPG 426
          . : . * . * : . . . : * . : * . : :

StuAP      WAPGYTTPRPAASS--LYNIVSDTRGTSGANGSTSDNYSVASNSGYS-TGMNGSMGSN 544
SnStuA    WNSGYPTPQRQPPSSN-LYNVMSDPRGAPNGNAPHDAYPGGAVPYASQGYPPANGNA 583
FoStuA    FYTLHNGYQPGVMNGMSPYKRRDDEAETPRPGPNVHDHLNFDLKRHKTMETSVPAPQY 486
          : . : : . . * : * : . . . : . .

StuAP      KMRDDDDDRIVPDSRGEFDT---KRRKTLTETPVGGVGGVP-LGLQQ----- 590
SnStuA    KRGRDDDEDYPYRPSVQSDDMGGLKRRKTMEGGAVGGAYAQDPTPGLQRAHTMTAQRAR 643
FoStuA    DAMNRPHSSIGTSPTYAPAPVYDNLARPASTVAASPSYPSAPVYDTGARPPSAISAPRRQ 546
          . . . . . * : * : . . . . * :

StuAP      ----
SnStuA    R--- 644
FoStuA    QSFG 550

```

**Fig. S1.** Multiple sequence alignment of SnStuA (SNOG\_14941) against StuAp (XP\_663440) from *A. nidulans* and FoStuA (BAD21357) from *F. oxysporum* using EBI Clustalw. The bold and italicized sequences show the APSES domain.
