# Supplementary material
Source: PubMed Central journal article supplement (PMC2901673)
Supplement: supp_9_7_1100__2.pdf [file supp_9_7_1100__2.pdf]

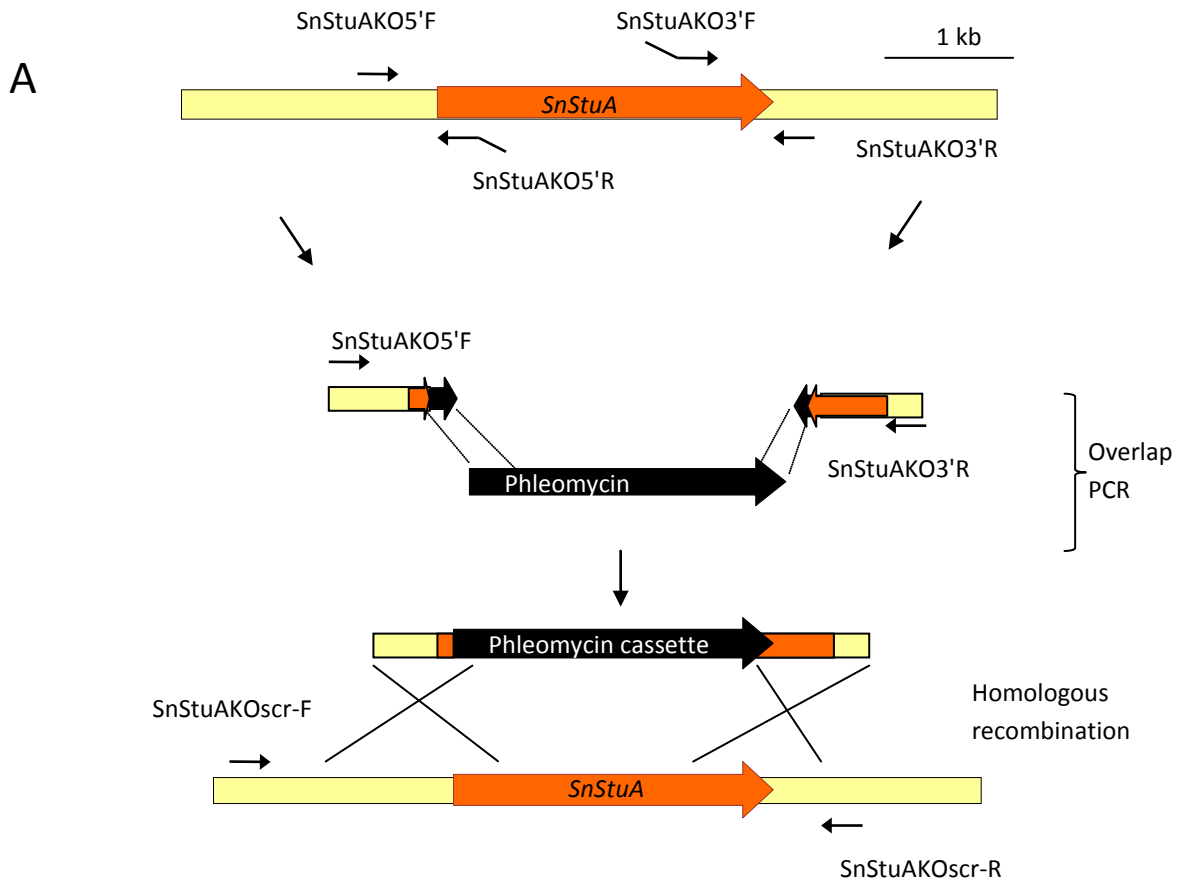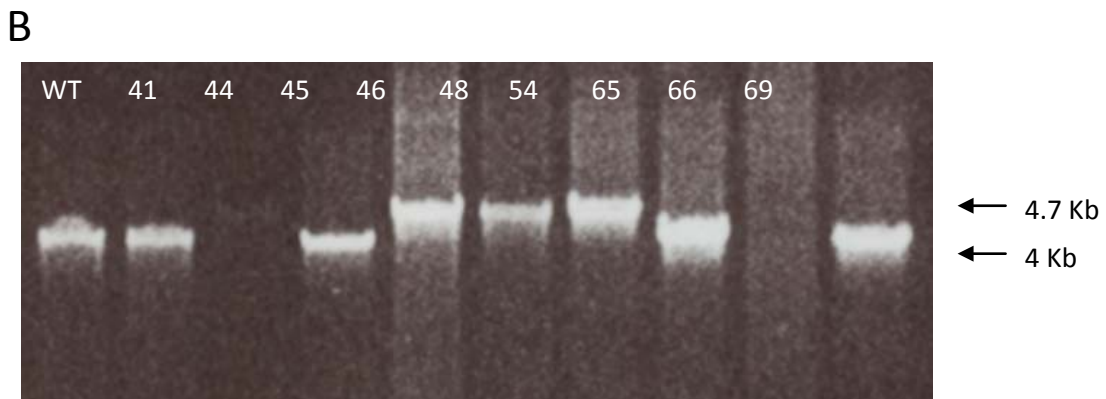

Fig. S2 (A) Schematics outlining the construction of the *SnStuA* knockout construct by overlap PCR and transformation by homologous gene replacement. (B) Agarose gel showing PCR products of *SnStuAScr* primer pairs on genomic DNA from different potential *SnStuA* deletion mutants. A product of 4.7Kb indicated a successful gene deletion while a product of 4Kb indicated an intact gene. Lane 1, SN15 gDNA; lane 2-10 showing phleomycin resistant transformants.
