# Supplementary material
Source: PubMed Central journal article supplement (PMC2901673)
Supplement: supp_9_7_1100__3.pdf [file supp_9_7_1100__3.pdf]

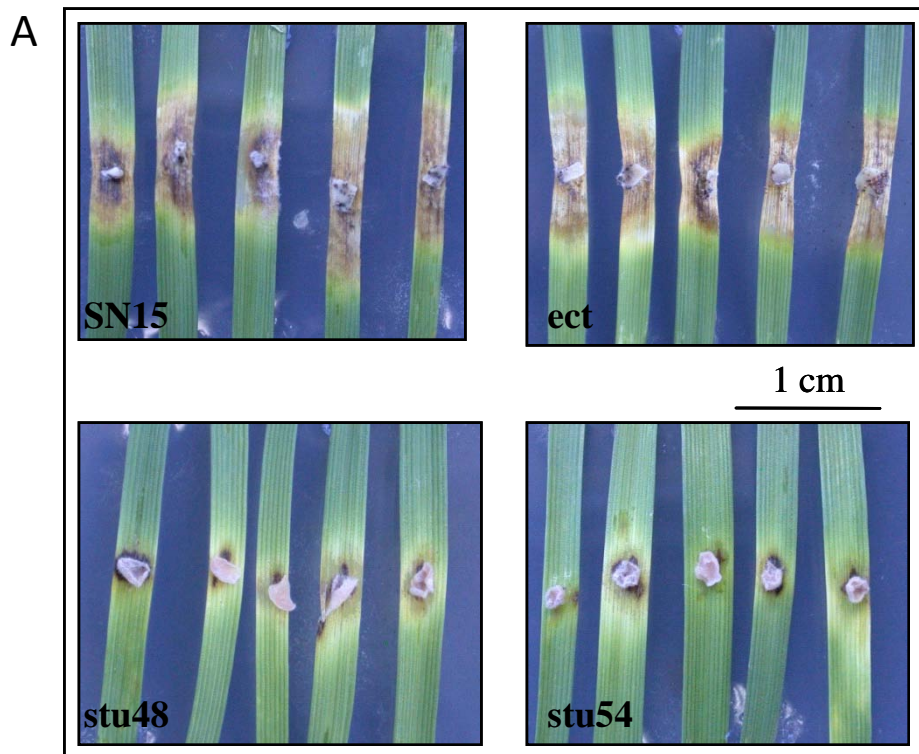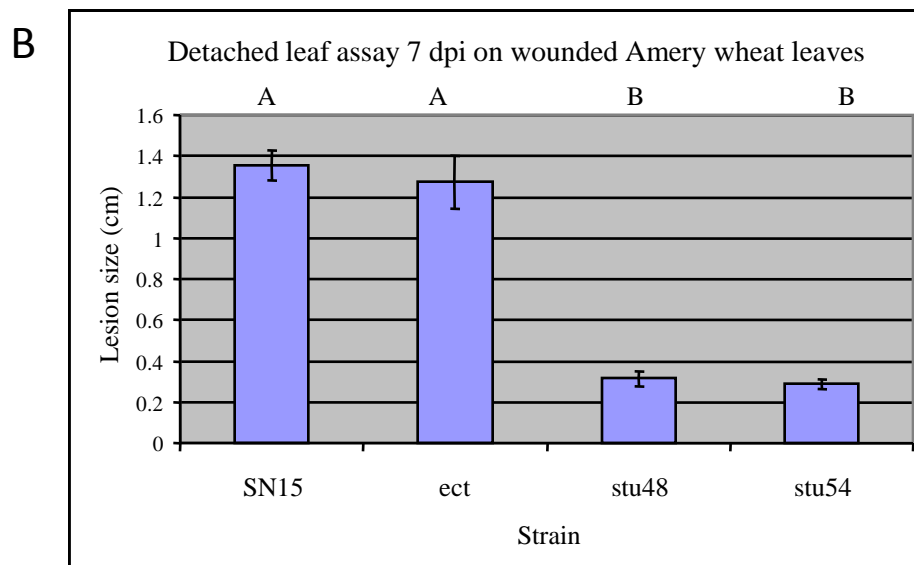

Fig. S3 Lesion development was investigated using wounded leaves for detached leaf assays. Pictures were taken 7 days post inoculation (A). The histogram illustrating the lesion size from different strains showed that the knockout mutants produced smaller lesions (B).
